# Supplementary material for: A Novel Approach toward Less Invasive Multiomics Gut Analyses: a Pilot Study
Source: PubMed Central journal article supplement (PMC9045184; doi:10.1128/spectrum.02446-21), 2022-03-28
Supplement: spectrum02446-21_supp_1_seq5.pdf [file spectrum02446-21_supp_1_seq5.pdf]

**Supplemental Table 1**

| <b>Sample Method</b> | <b>Sequence Depth (Gbp)</b> | <b>Total Reads (million)</b> | <b>Bacterial Reads (%)</b> |
|----------------------|-----------------------------|------------------------------|----------------------------|
| Biopsy               | 2.04±0.47                   | 14.5±7.2                     | 26.5±11.5                  |
| Cytology Brush       | 4.22±3.03                   | 41.7±31.9                    | 59.1±23.9*                 |

Mean number ± SD of gigabase pairs sequenced (Gbp), sequenced reads (in millions) after removal of poor quality reads, and bacterial percentage of reads following metatranscriptomics sequencing comparing pinch biopsy and cytology brush methods. N=5 samples per group. \*, P<0.05 as determined by Student's t-test comparing biopsy to cytology brush.

**Supplemental Table 2**

| Class                 | Mean $\pm$ SEM (%) |                   | P value         |
|-----------------------|--------------------|-------------------|-----------------|
|                       | Biopsy             | Cytology Brush    |                 |
| Methanobacteria       | 1.08 $\pm$ 2.42    | 1.66 $\pm$ 3.71   | 0.778           |
| Actinobacteria        | 56.11 $\pm$ 21.16  | 22.26 $\pm$ 14.88 | <b>0.019</b>    |
| Bacteroidia           | 2.21 $\pm$ 4.95    | 11.58 $\pm$ 14.89 | 0.219           |
| Bacilli               | 29.35 $\pm$ 5.43   | 10.82 $\pm$ 11.33 | <b>0.011</b>    |
| Clostridia            | 4.11 $\pm$ 7.32    | 47.71 $\pm$ 10.84 | <b>0.00007*</b> |
| Negativicutes         | 0.80 $\pm$ 1.78    | 1.28 $\pm$ 2.85   | 0.757           |
| Betaproteobacteria    | 0.03 $\pm$ 0.05    | 1.28 $\pm$ 2.55   | 0.306           |
| Deltaproteobacteria   | 0.00 $\pm$ 0.00    | 0.65 $\pm$ 1.45   | 0.346           |
| Epsilonproteobacteria | 0.00 $\pm$ 0.00    | 0.07 $\pm$ 0.16   | 0.346           |
| Gammaproteobacteria   | 6.31 $\pm$ 7.00    | 2.68 $\pm$ 2.32   | 0.304           |

Top 10 bacterial classes identified as different between the two collection methods. Data shown as mean  $\pm$  SEM. Three classes noted to be significantly different with p-value <0.05 and one with FDR <0.05 as indicated by the asterisk.

**Supplemental Table 3**

| Species                         | Mean $\pm$ SEM (%) |                   | P-value       |
|---------------------------------|--------------------|-------------------|---------------|
|                                 | Biopsy             | Cytology Brush    |               |
| Faecalibacterium prausnitzii    | 2.27 $\pm$ 3.36    | 17.37 $\pm$ 11.62 | <b>0.023</b>  |
| Fingoldia magna                 | 0.00 $\pm$ 0.00    | 12.49 $\pm$ 19.77 | 0.195         |
| Methanobrevibacter unclassified | 1.08 $\pm$ 2.42    | 2.11 $\pm$ 4.72   | 0.676         |
| Parabacteroides unclassified    | 1.55 $\pm$ 3.46    | 8.52 $\pm$ 11.94  | 0.246         |
| Propionibacterium acnes         | 53.2 $\pm$ 18.44   | 13.76 $\pm$ 12.17 | <b>0.004*</b> |
| Pseudomonas unclassified        | 5.13 $\pm$ 6.44    | 0.93 $\pm$ 2.07   | 0.202         |
| Ruminococcus lactaris           | 0.01 $\pm$ 0.02    | 3.27 $\pm$ 3.02   | <b>0.042</b>  |
| Ruminococcus torques            | 1.72 $\pm$ 3.84    | 12.22 $\pm$ 14.01 | 0.145         |
| Streptococcus thermophilus      | 32.14 $\pm$ 4.69   | 13.54 $\pm$ 15.18 | <b>0.031</b>  |
| Subdoligranulum unclassified    | 0.13 $\pm$ 0.29    | 4.35 $\pm$ 5.54   | 0.127         |
| Others                          | 2.68 $\pm$ 2.09    | 11.44 $\pm$ 7.71  | <b>0.039</b>  |

Top 10 bacterial species identified as different between the two collection methods. Data shown as mean  $\pm$  SEM. Four species noted to be significantly different with p-value <0.05 and one with FDR <0.05 as indicated by the asterisk.

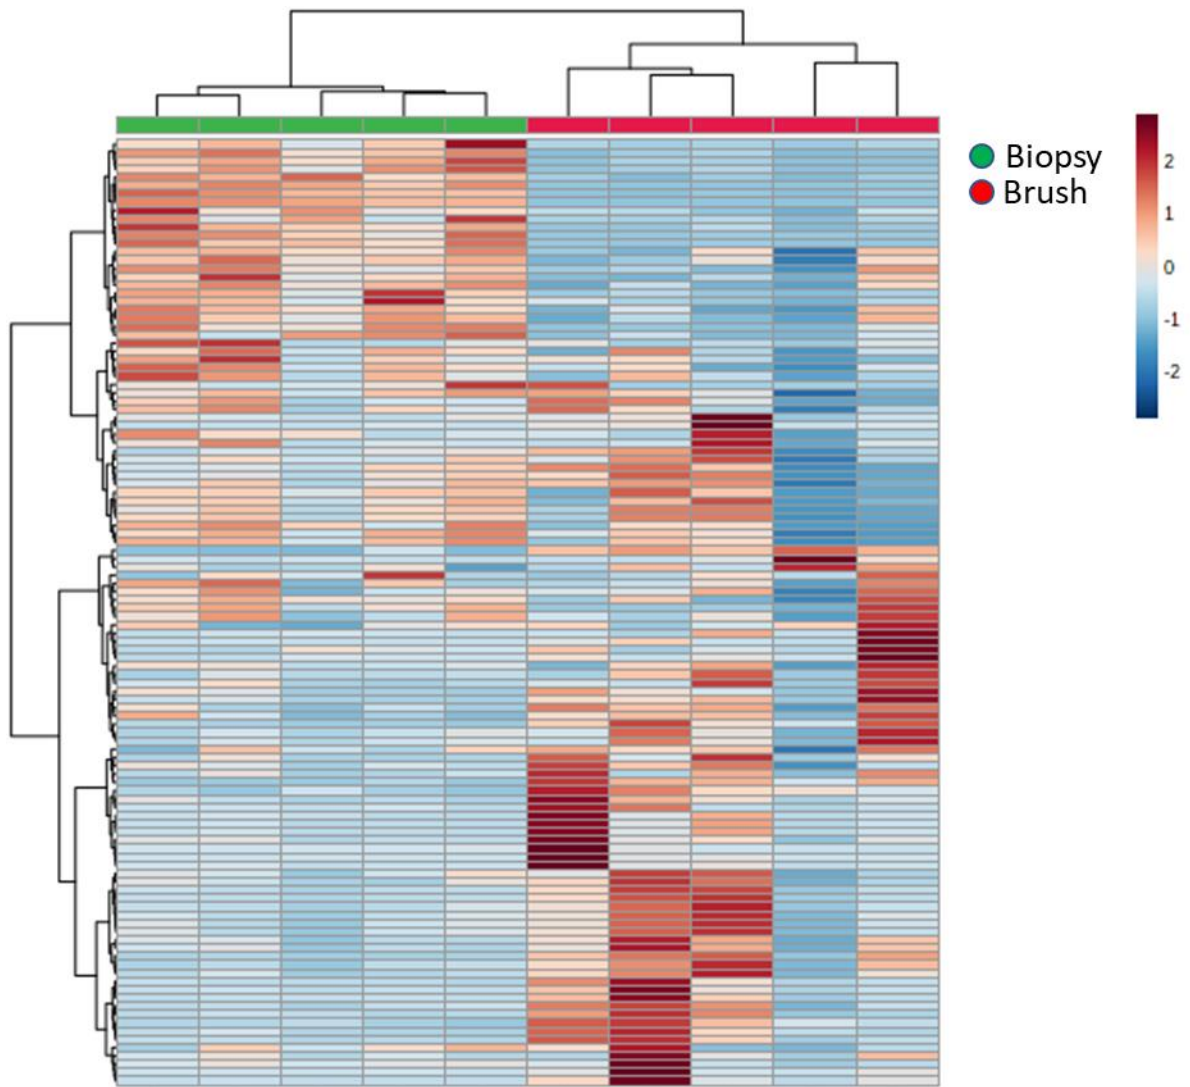

**Supplemental Figure 1.** Heat map demonstrating all 114 metabolites comparing the pinch biopsy versus cytology brush collection methods.

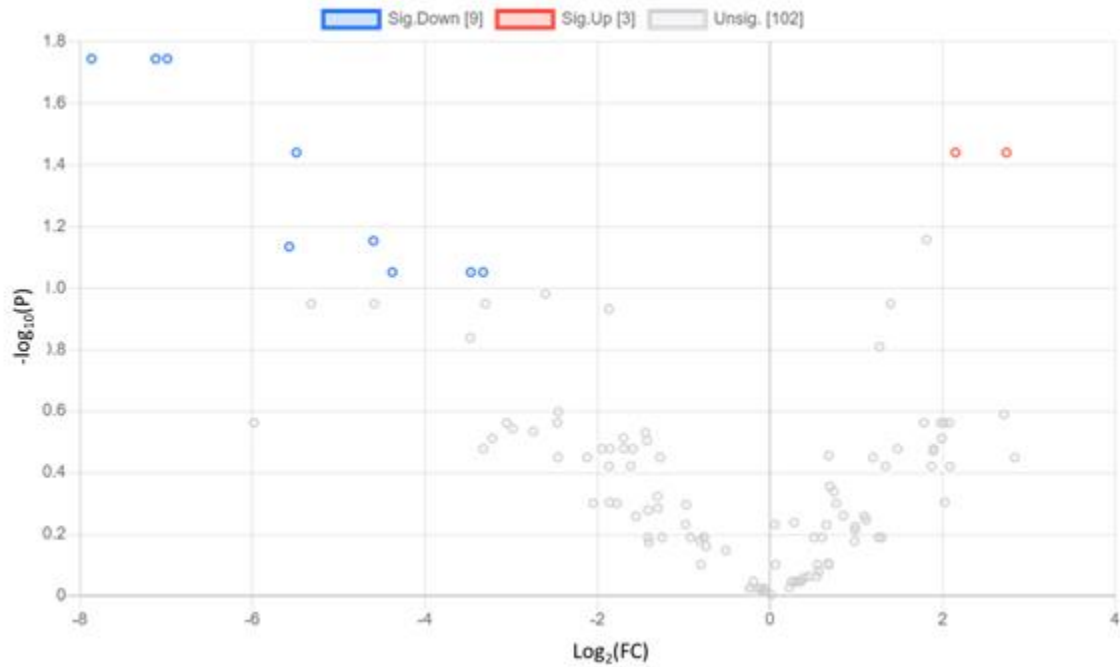

**Supplemental Figure 2.** Volcano plot demonstrating 114 metabolites identified as significantly up (red), down (blue), or unchanged (gray) comparing the pinch biopsy versus cytology brush collection method. Significance determined by fold change  $>2.0$  and Wilcoxon signed-rank test with FDR adjusted p-value  $<0.1$ .

**Supplemental Table 4**

| <b>Metabolite</b>                  | <b>Log<sub>2</sub>(FC)</b> | <b>P-value (FDR adjusted)</b> |
|------------------------------------|----------------------------|-------------------------------|
| D-Glucono-1-5-lactone 6-phosphate* | -7.86                      | 0.018                         |
| Cys-Gly                            | -7.12                      | 0.018                         |
| alpha-D-Glucosamine 1-phosphate*   | -6.98                      | 0.018                         |
| 5-hydroxytryptophan†               | -5.45                      | 0.036                         |
| 2-Hydroxyglutarate/Citramalate     | 2.74                       | 0.036                         |
| Itaconate                          | 2.15                       | 0.036                         |
| L-cysteine                         | -4.59                      | 0.070                         |
| D-Erythrose 4-phosphate            | -5.57                      | 0.073                         |
| N5-Methyl-L-glutamine              | -4.38                      | 0.089                         |
| N-Acetyl-L-citrulline              | -3.47                      | 0.089                         |
| CMP                                | -3.32                      | 0.089                         |

Metabolites identified as significant (fold change, FC >2.0 and paired-t-test with FDR adjusted p-value <0.1) for comparison between pinch biopsy and cytology brush collection method.
